# Supplementary material for: Efficacy and safety of pyrotinib-based regimens in patients with HER2-positive stage III/IV breast cancer: a real-world retrospective study in China
Source: PeerJ. 2026 Jan 13;14:e20524. doi: 10.7717/peerj.20524 (PMC12810360; doi:10.7717/peerj.20524)
Supplement: Supplemental Information 1 [file peerj-14-20524-s001.xlsx]

## Sheet: Sheet1
Age	ECOG performance status	Menopause	Clinical stage	Number of metastasis	Hormone-receptor status	Pyrotinib treatment lines	Efficacy assessment	Initial dose of pyrotinib	Ki67	PFS	Previous anti-HER2 condition	targeted therapies	Brain metastases	Trastuzumab resistance	Visceral metastasis	Previous use of lapatinib	Treatment	Survival condition	Clinical stage	Diarrhea degree	AST	ALT	WBC	HGB	NEUT
51	1	Yes	4	≤2	Negative	3	PR	320mg/d	≥15%	21	Yes	Single target	No	Yes	Yes	No	Pyrotinib +Capecitabine	PD	Ⅳ	3
46	1	No	4	≤2	Positive	3	PR	400mg/d	≥15%	11	Yes	Double target	No	Yes	Yes	No	Pyrotinib +Capecitabine	PD	Ⅳ	3	45		3.05	111	1.35
41	1	No	4	＞2	Negative	1	PR	240mg/d	≥15%	6.1	No	Double target	No	NA	Yes	No	Pyrotinib +Other chemotherapy	PD	Ⅳ	1	48	92		99
47	1	No	3	≤2	Positive	3	SD	400mg/d	≥15%	17.2	Yes	Single target	No	No	Yes	No	Pyrotinib + endocrine	No PD	Ⅳ	1			3.39		1.48
59	1	Yes	4	≤2	Positive	3	SD	400mg/d	＜15%	2.2	Yes	Double target	No	Yes	Yes	Yes	Pyrotinib +Other chemotherapy	PD	Ⅳ	1
62	0	Yes	4	≤2	Negative	1	PR	240mg/d	≥15%	18	No	Double target	No	NA	No	No	Pyrotinib +Other chemotherapy	PD	Ⅳ	2				107
48	0	No	4	≤2	Negative	2	PR	400mg/d	＜15%	17.9	Yes	Single target	No	Yes	Yes	No	Pyrotinib +Capecitabine	PD	Ⅳ	2				112
48	1	No	4	＞2	Positive	2	SD	400mg/d	≥15%	5	Yes	Single target	Yes	Yes	Yes	No	Pyrotinib +Other chemotherapy	PD	Ⅳ	3			3.41		1.55
52	0	Yes	4	≤2	Negative	1	PR	320mg/d	≥15%	3.7	No	Double target	No	NA	No	No	Pyrotinib +Other chemotherapy	PD	Ⅳ	1				112
56	1	Yes	4	≤2	Negative	2	SD	320mg/d	≥15%	4	Yes	Double target	No	Yes	No	No	Pyrotinib +Other chemotherapy	PD	Ⅳ	2	46	49
55	1	Yes	4	≤2	Negative	2	SD	320mg/d	≥15%	27	Yes	Double target	Yes	No	Yes	No	Pyrotinib + endocrine	No PD	Ⅳ	1
45	1	No	4	≤2	Positive	3	SD	320mg/d	≥15%	4	Yes	Single target	No	Yes	Yes	No	Pyrotinib +Other chemotherapy	PD	Ⅳ	1
33	0	No	3	≤2	Positive	1	PR	320mg/d	≥15%	28.7	No	Double target	No	NA	Yes	No	Pyrotinib +Other chemotherapy	No PD	Ⅳ	2			3.2	84
64	1	Yes	4	≤2	Negative	2	PR	320mg/d	≥15%	4.8	No	Double target	No	NA	Yes	No	Pyrotinib +Other chemotherapy	PD	Ⅳ	1			3.16	105
51	1	Yes	3	＞2	Negative	3	PR	400mg/d	≥15%	6	Yes	Single target	No	Yes	Yes	Yes	Pyrotinib +Other chemotherapy	PD	Ⅳ	2			2.46		1.33
55	2	Yes	4	≤2	Negative	2	SD	400mg/d	≥15%	12	Yes	Single target	No	Yes	Yes	No	Pyrotinib +Other chemotherapy	PD	Ⅳ	0
57	0	Yes	4	≤2	Negative	1	PR	320mg/d	≥15%	9.3	Yes	Double target	No	No	Yes	No	Pyrotinib +Capecitabine	No PD	Ⅳ	3	48		2.54	105
29	1	No	4	≤2	Positive	1	PR	400mg/d	＜15%	32.9	No	Double target	No	NA	Yes	No	Pyrotinib +Other chemotherapy	No PD	Ⅳ	2
46	1	Yes	4	≤2	Positive	3	PR	320mg/d	＜15%	33	No	Double target	No	NA	Yes	No	Pyrotinib +Other chemotherapy	No PD	Ⅳ	1			3.13	99
49	0	Yes	4	≤2	Positive	2	PR	400mg/d	≥15%	15.9	Yes	Single target	No	No	Yes	No	Pyrotinib +Capecitabine	PD	Ⅳ	1
53	2	Yes	4	≤2	Positive	1	PR	160mg/d	＜15%	5.8	No	Double target	No	NA	Yes	No	Pyrotinib +Other chemotherapy	No PD	Ⅳ	1	77	78		101
53	1	Yes	4	≤2	Negative	2	PR	240mg/d	≥15%	11	Yes	Double target	Yes	Yes	Yes	No	Pyrotinib +Other chemotherapy	PD	Ⅳ	3				111
45	1	Yes	4	＞2	Positive	3	PR	400mg/d	≥15%	4	Yes	Single target	No	Yes	Yes	No	Pyrotinib +Capecitabine	PD	Ⅳ	1	61		3.31	111	1.4
79	1	Yes	4	≤2	Positive	2	SD	320mg/d	≥15%	9	Yes	Double target	No	No	Yes	No	Pyrotinib + endocrine	PD	Ⅳ	3				111
38	1	No	4	≤2	Negative	2	PR	240mg/d	≥15%	10	Yes	Single target	No	No	Yes	No	Pyrotinib +Other chemotherapy	No PD	Ⅳ	3	48			102
52	2	Yes	4	≤2	Negative	2	SD	320mg/d	≥15%	10	Yes	Single target	Yes	Yes	Yes	No	Pyrotinib +Capecitabine	PD	Ⅳ	1			2.67		1.42
54	1	Yes	4	＞2	Positive	2	PR	320mg/d	≥15%	16.9	Yes	Double target	No	No	Yes	No	Pyrotinib +Capecitabine	PD	Ⅳ	3			2.03	112	1.38
42	1	No	4	≤2	Negative	1	PR	400mg/d	≥15%	13.8	Yes	Single target	No	Yes	Yes	No	Pyrotinib +Capecitabine	No PD	Ⅳ	1
38	1	No	4	＞2	Positive	2	PD	240mg/d	≥15%	3	Yes	Double target	Yes	Yes	Yes	No	Pyrotinib +Other chemotherapy	PD	Ⅳ	2
44	0	No	3	≤2	Negative	1	SD	400mg/d	≥15%	13	Yes	Single target	No	No	No	No	Pyrotinib alone	PD	Ⅲ	2				107
42	1	No	4	≤2	Negative	1	PR	320mg/d	≥15%	23.5	Yes	Double target	No	No	No	No	Pyrotinib +Other chemotherapy	PD	Ⅳ	1				107	1.55
46	1	No	4	＞2	Negative	2	PR	400mg/d	≥15%	17.3	Yes	Double target	No	Yes	Yes	No	Pyrotinib +Other chemotherapy	PD	Ⅳ	3	41
50	1	No	4	≤2	Negative	2	PD	400mg/d	≥15%	1.9	Yes	Double target	No	Yes	Yes	No	Pyrotinib +Capecitabine	PD	Ⅳ	3	49		3.63	93
62	1	Yes	4	≤2	Negative	1	PR	400mg/d	≥15%	35.1	Yes	Single target	No	No	Yes	No	Pyrotinib +Capecitabine	PD	Ⅳ	1	45
55	1	Yes	4	＞2	Positive	3	PR	160mg/d	≥15%	4.5	Yes	Double target	Yes	Yes	Yes	No	Pyrotinib +Other chemotherapy	PD	Ⅳ	3		5		102
49	0	Yes	3	≤2	Negative	1	SD	320mg/d	≥15%	17.9	Yes	Single target	No	No	No	No	Pyrotinib + endocrine	No PD	Ⅲ	1				102
53	1	Yes	4	≤2	Positive	2	SD	400mg/d	≥15%	2.9	Yes	Double target	No	No	Yes	No	Pyrotinib +Capecitabine	PD	Ⅳ	3					1.73
